### Erratum

#### **Sedation with Dexmedetomidine or Propofol Impairs Hypoxic Control of Breathing in Healthy Male Volunteers: A Nonblinded, Randomized Crossover Study: Erratum**

In the article beginning on page 700 of the October 2016 issue, the phrase, “concentrations in plasma at the sedation target were  $0.66 \pm 0.14$  and  $1.26 \pm 0.36$   $\mu\text{g/ml}$  for dexmedetomidine and propofol, respectively” is incorrect due to a publisher error. The correct phrase is “concentrations in plasma at the sedation target were  $0.66 \pm 0.14$   $\text{ng/ml}$  and  $1.26 \pm 0.36$   $\mu\text{g/ml}$  for dexmedetomidine and propofol, respectively.”

#### **Reference**

Lodénius Å, Ebberyd A, Hårdemark Cedborg A, Hagel E, Mkrtchian S, Christensson E, Ullman J, Scheinin M, Eriksson LI, Jonsson Fagerlund M: Sedation with dexmedetomidine or propofol impairs hypoxic control of breathing in healthy male volunteers: A nonblinded, randomized crossover study. *ANESTHESIOLOGY* 2016; 125:700–15

### Erratum

#### **“Protective Ventilation” During Anesthesia: Is It Meaningful? Erratum**

In the article beginning on page 1079 of the December 2016 issue, an incorrect reference appears in the References list. Reference 25 is incorrect, and should instead be listed as: “Edmark L, Auner U, Hallen J, Lassinantti-Olowsson L, Hedenstierna G, Enlund M: A ventilation strategy during general anaesthesia to reduce postoperative atelectasis. *Uppsala Journal of Medical Sciences* 2014; 55:75–81.”

#### **Reference**

Hedenstierna G, Edmark L: “Protective ventilation” during anesthesia: Is it meaningful? *ANESTHESIOLOGY* 2016; 125:1079–82

### Erratum

#### **All Valve Functions Are Not the Same: Erratum**

In the letter beginning on page 758 of the September 2010 issue, the first author’s surname was spelled incorrectly. It should have appeared as “Giordano.”

#### **Reference**

Giordano C, Gravenstein N, Rice MJ: All valve functions are not the same. *ANESTHESIOLOGY* 2010; 113:758
